# Supplementary material
Source: publisher figshare collection journal article supplement (https://acs.figshare.com/ndownloader/files/26533059)
Supplement: Supplementary file 1 [file 26533059]

# Supporting Information

## Transparent Conductive Silk Film with a PEDOT-OH Nano Layer as an Electroactive Cell Interface

Ao Zhuang<sup>1</sup>, Qichao Pan<sup>1</sup>, Ying Qian<sup>1</sup>, Suna Fan<sup>1</sup>, Xiang Yao<sup>1</sup>, Lujie Song<sup>\*3</sup>, Bo Zhu<sup>\*2</sup>, Yaopeng Zhang<sup>\*1</sup>

*<sup>1</sup> State Key Laboratory for Modification of Chemical Fibers and Polymer Materials, Shanghai Belt and Road Joint Laboratory of Advanced Fiber and Low-Dimension Materials, College of Materials Science and Engineering, Donghua University, Shanghai 201620, China*

*<sup>2</sup> School of Materials Science and Engineering, Shanghai University, Shanghai 200444, China*

*<sup>3</sup> Department of Urology, Shanghai Jiao Tong University Affiliated Sixth People's Hospital, Shanghai 200233, P. R. China*

Corresponding Authors:

Prof. Yaopeng Zhang, E-mail: [zyp@dhu.edu.cn](mailto:zyp@dhu.edu.cn);

Prof. Bo Zhu, E-mail: [bozhu@shu.edu.cn](mailto:bozhu@shu.edu.cn)

Prof. Lujie Song, E-mail: [ljsong@sjtu.edu.cn](mailto:ljsong@sjtu.edu.cn)

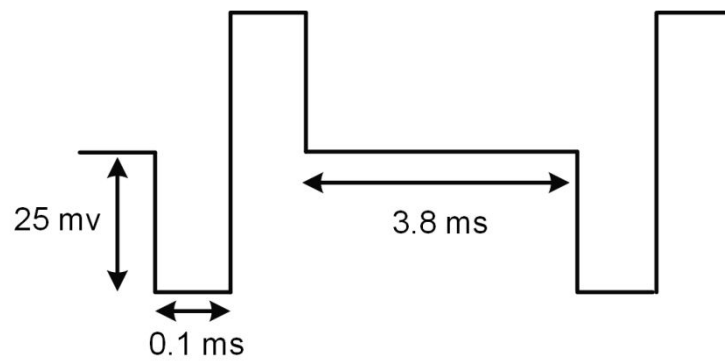

**Figure S1.** Illustration of the electric signal released on cells.

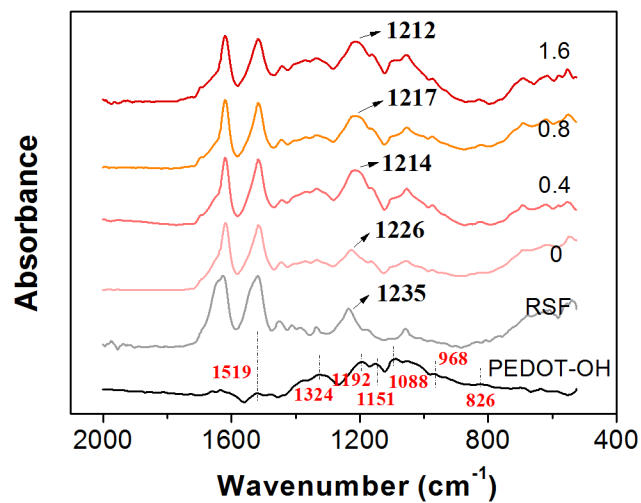

**Figure S2.** FTIR spectra of PEDOT-OH, pristine RSF and RSF/PEDOT-OH films with  $n(\text{FeCl}_3)/n(\text{monomer}) = 0.1$  and gradient SDS dosage in  $\text{FeCl}_3$  system.

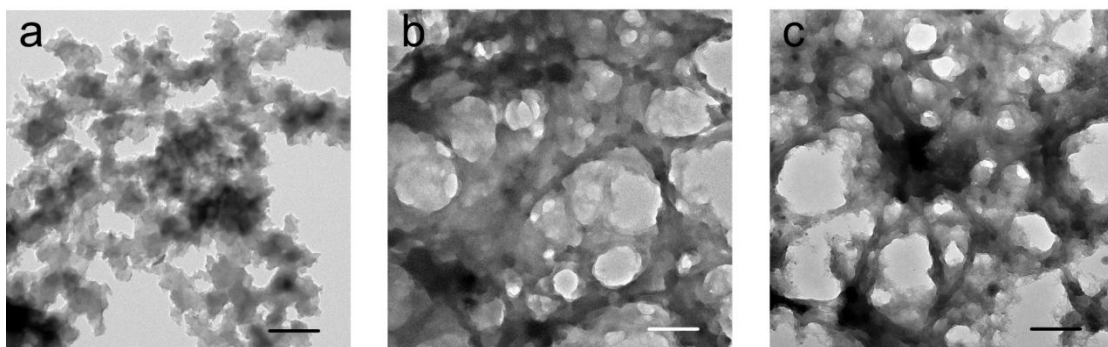

**Figure S3.** TEM images of PEDOT-OH polymerized in water in (a) single  $\text{FeCl}_3$  system (b) single APS system (c) and composite oxidant system. Scale bar represents 500 nm.

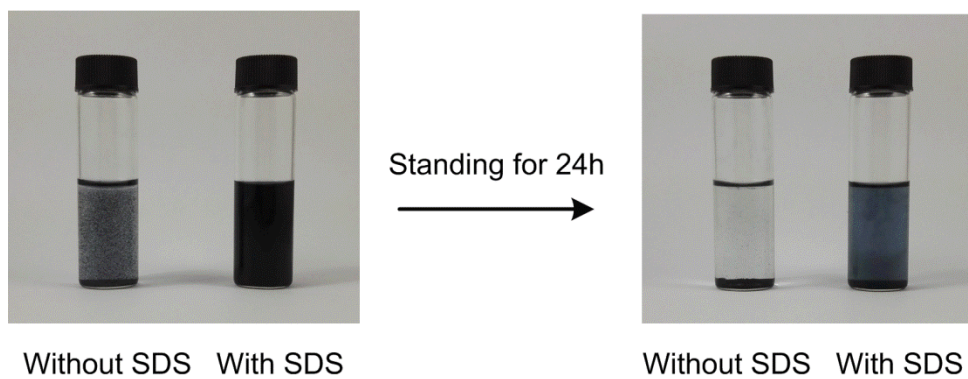

**Figure S4.** Photos of aqueous systems with or without SDS after polymerization in  $\text{FeCl}_3$  system.

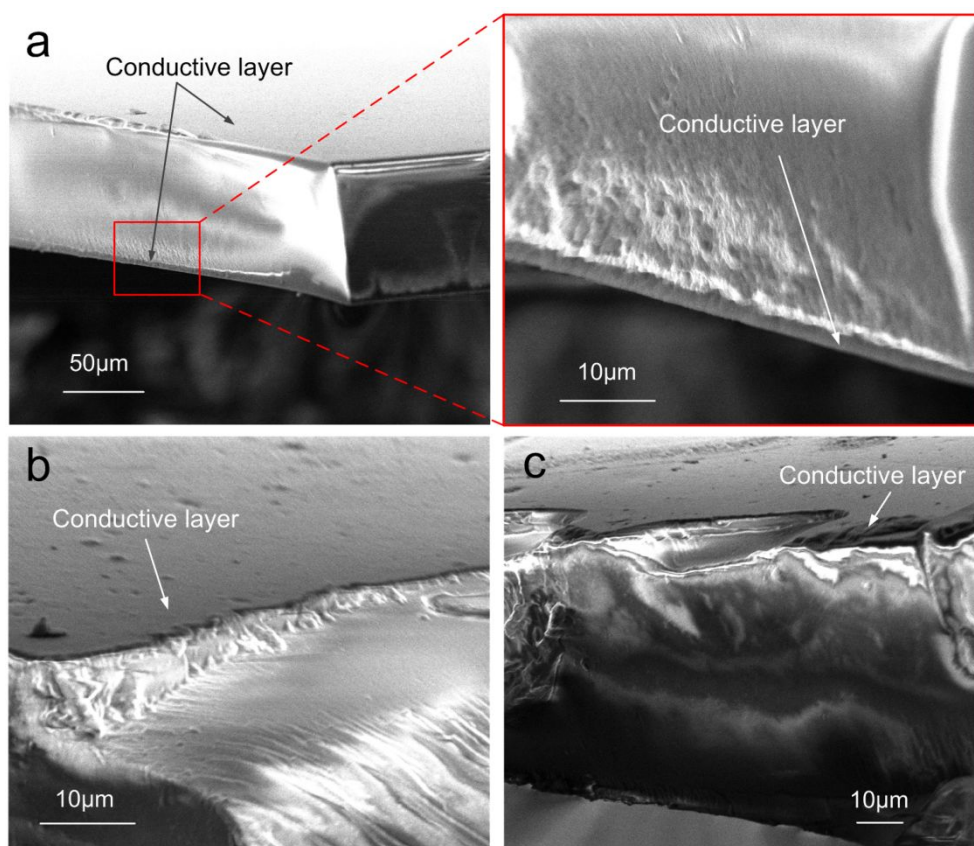

**Figure S5.** SEM of the conductive layer on RSF surface at different positions. The film was produced in composite oxidants system with  $n(\text{FeCl}_3)/n(\text{monomer}) = 0.5$ ,  $n(\text{APS})/n(\text{monomer}) = 1$ .

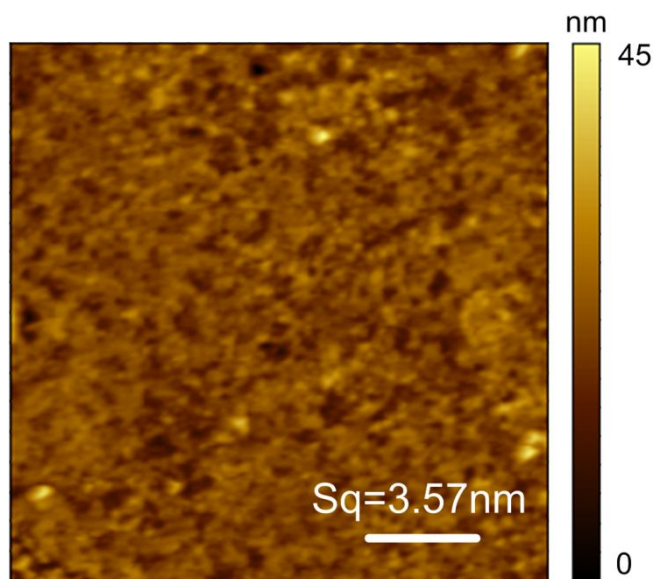

**Figure S6.** AFM image of the surface of the pristine RSF film. Scale bar: 1  $\mu\text{m}$ .

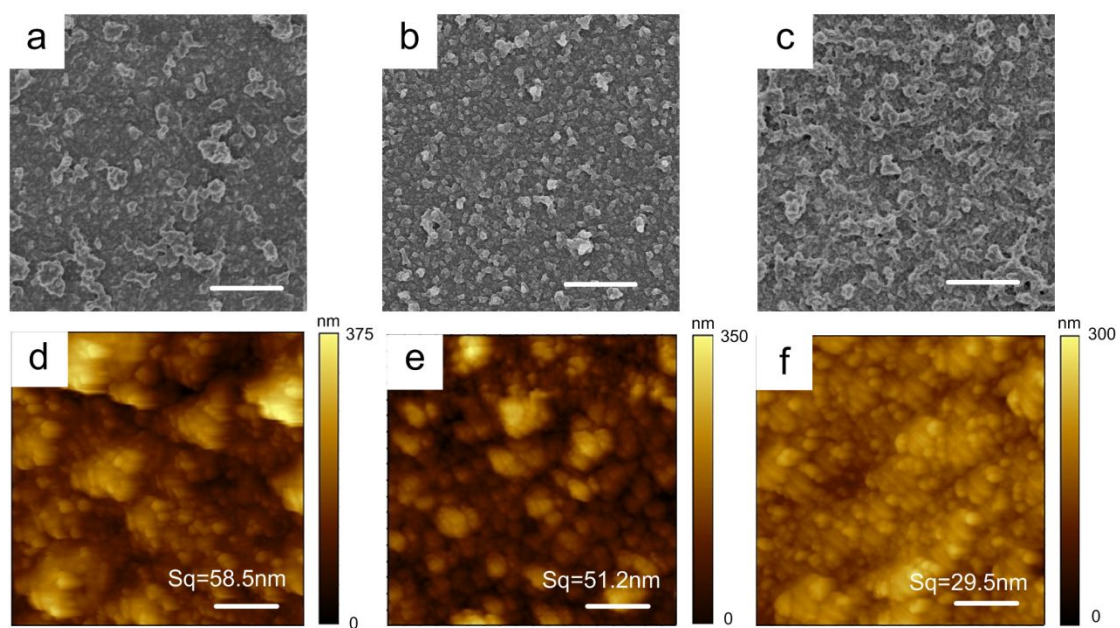

**Figure S7.** SEM and AFM images of the surface of RSF/PEDOT-OH films with (a) (d)  $n(\text{SDS})/n(\text{monomer}) = 0.4$ ,  $n(\text{FeCl}_3)/n(\text{monomer}) = 0.5$ , (b) (e)  $n(\text{SDS})/n(\text{monomer}) = 0.4$ ,  $n(\text{FeCl}_3)/n(\text{monomer}) = 0.1$ , (c) (f)  $n(\text{SDS})/n(\text{monomer}) = 0.8$ ,  $n(\text{FeCl}_3)/n(\text{monomer}) = 0.1$ . Scale bar: 1  $\mu\text{m}$ .
